# Supplementary material
Source: bioRxiv or medRxiv preprint supplement (https://www.biorxiv.org/highwire/filestream/6027/field_highwire_adjunct_files/1/022889-10.pdf)
Supplement: Supplementary file [file 022889-10.pdf]

**Additional File 10 Estimates of population divergence times, using (a)  $r^2$  and (b)  $\sigma^2$  statistics, as estimator of LD level.**

**a**

| TIME              | South_Africa  |                |                | East_Africa   |                |                | West_Africa    |                |                |
|-------------------|---------------|----------------|----------------|---------------|----------------|----------------|----------------|----------------|----------------|
|                   | 0.05          | 0.50           | 0.95           | 0.05          | 0.50           | 0.95           | 0.05           | 0.50           | 0.95           |
| Europe            | 66,865        | 74,595         | 81,894         | 63,135        | 69,736         | 76,645         | 74,138         | 81,354         | 88,626         |
| Caucasus          | 68,014        | 74,933         | 81,204         | 62,363        | 68,143         | 74,016         | 74,801         | 81,228         | 87,478         |
| West_Asia         | 66,495        | 73,546         | 81,188         | 60,458        | 66,318         | 73,247         | 73,105         | 79,715         | 87,337         |
| Central_Asia      | 71,064        | 76,762         | 85,188         | 66,166        | 71,021         | 78,819         | 78,359         | 83,596         | 91,992         |
| North_India       | 72,839        | 77,974         | 86,111         | 65,930        | 70,230         | 77,595         | 79,133         | 83,829         | 91,904         |
| South_India       | 65,283        | 69,703         | 76,457         | 60,625        | 64,396         | 70,718         | 72,139         | 76,166         | 82,932         |
| East_Asia         | 82,978        | 89,638         | 98,162         | 81,456        | 87,432         | 95,874         | 91,378         | 97,477         | 105,966        |
| South_Asia        | 77,802        | 85,002         | 93,417         | 74,310        | 80,587         | 88,651         | 85,615         | 92,279         | 100,655        |
| Malaysia          | 69,078        | 74,544         | 83,461         | 66,862        | 71,622         | 80,114         | 76,572         | 81,433         | 90,182         |
| Borneo            | 77,166        | 82,244         | 90,569         | 75,517        | 80,056         | 88,234         | 85,475         | 90,029         | 98,318         |
| Sumatra           | 77,742        | 84,720         | 93,621         | 75,884        | 82,043         | 90,707         | 85,877         | 92,222         | 101,013        |
| East_Indonesia    | 69,028        | 74,492         | 82,788         | 66,801        | 71,576         | 79,538         | 76,719         | 81,629         | 89,830         |
| Philippine        | 75,675        | 81,547         | 90,458         | 74,051        | 79,248         | 87,916         | 83,790         | 89,053         | 97,846         |
| Moluccas          | 68,071        | 73,760         | 81,899         | 66,571        | 71,562         | 79,457         | 75,861         | 80,951         | 88,970         |
| <b>Australia</b>  | <b>88,134</b> | <b>97,946</b>  | <b>109,839</b> | <b>87,828</b> | <b>96,599</b>  | <b>108,214</b> | <b>96,568</b>  | <b>105,461</b> | <b>117,025</b> |
| <b>New_Guinea</b> | <b>98,298</b> | <b>106,353</b> | <b>118,689</b> | <b>99,852</b> | <b>107,204</b> | <b>119,569</b> | <b>105,237</b> | <b>112,166</b> | <b>123,850</b> |
| Fiji              | 72,170        | 78,848         | 85,832         | 71,465        | 77,395         | 84,437         | 80,283         | 86,315         | 93,221         |
| Polynesia         | 70,968        | 77,397         | 86,418         | 71,753        | 77,531         | 86,510         | 79,386         | 85,110         | 93,950         |
| Onge              | 75,929        | 81,853         | 90,374         | 77,243        | 82,572         | 91,234         | 84,806         | 89,904         | 98,179         |
| Jehai             | 66,745        | 72,532         | 81,126         | 66,414        | 71,521         | 79,922         | 74,984         | 80,104         | 88,529         |
| Mamanwa           | 67,854        | 73,580         | 83,338         | 67,925        | 73,012         | 82,492         | 76,151         | 81,200         | 90,741         |

b

| TIME           | South_Africa  |               |                | East_Africa   |               |                | West_Africa   |                |                |
|----------------|---------------|---------------|----------------|---------------|---------------|----------------|---------------|----------------|----------------|
|                | 5             | 50            | 95             | 5             | 50            | 95             | 5             | 50             | 95             |
| Europe         | 59,272        | 68,157        | 74,614         | 57,084        | 65,402        | 70,830         | 66,508        | 75,174         | 82,892         |
| Caucasian      | 60,536        | 67,687        | 74,502         | 56,531        | 63,196        | 68,797         | 67,303        | 74,259         | 82,260         |
| West_Asia      | 59,685        | 66,622        | 73,309         | 55,174        | 61,586        | 67,061         | 66,240        | 73,021         | 80,843         |
| Central_Asia   | 63,899        | 69,991        | 76,739         | 60,510        | 66,425        | 72,061         | 71,134        | 77,072         | 85,081         |
| North_India    | 65,580        | 70,732        | 78,142         | 60,270        | 65,243        | 71,325         | 71,857        | 76,857         | 85,375         |
| South_India    | 58,715        | 64,075        | 70,532         | 55,445        | 60,664        | 66,051         | 65,495        | 70,736         | 78,358         |
| East_Asia      | 73,798        | 81,274        | 87,923         | 73,793        | 81,398        | 87,241         | 82,165        | 89,435         | 97,575         |
| South_Asia     | 69,438        | 76,417        | 84,626         | 67,515        | 74,425        | 81,458         | 77,213        | 84,003         | 93,562         |
| Malaysia       | 61,829        | 67,443        | 74,841         | 61,092        | 66,852        | 73,143         | 69,356        | 74,724         | 83,462         |
| Borneo         | 68,824        | 74,485        | 82,767         | 68,644        | 74,579        | 81,799         | 77,089        | 82,578         | 92,290         |
| Sumatra        | 69,627        | 76,307        | 84,198         | 69,281        | 76,108        | 82,934         | 77,768        | 84,202         | 93,540         |
| East_Indonesia | 62,028        | 67,758        | 74,901         | 61,208        | 67,056        | 73,154         | 69,703        | 75,223         | 83,719         |
| Philippine     | 67,791        | 73,921        | 82,298         | 67,651        | 73,996        | 81,242         | 75,911        | 81,805         | 91,607         |
| Moluccas       | 60,818        | 66,794        | 74,031         | 60,753        | 66,875        | 73,078         | 68,619        | 74,353         | 82,968         |
| Australia      | <b>78,451</b> | <b>88,127</b> | <b>98,594</b>  | <b>79,827</b> | <b>89,596</b> | <b>98,794</b>  | <b>87,027</b> | <b>96,234</b>  | <b>108,224</b> |
| New_Guinea     | <b>87,360</b> | <b>95,573</b> | <b>107,941</b> | <b>90,693</b> | <b>99,499</b> | <b>110,530</b> | <b>94,748</b> | <b>102,325</b> | <b>116,058</b> |
| Fiji           | 64,875        | 71,258        | 78,000         | 65,546        | 72,155        | 78,014         | 72,991        | 79,118         | 87,323         |
| Polynesia      | 63,401        | 69,935        | 77,564         | 65,566        | 72,451        | 79,150         | 71,859        | 78,090         | 87,223         |
| Onge           | 67,987        | 74,305        | 82,275         | 70,827        | 77,670        | 84,637         | 76,981        | 82,918         | 92,535         |
| Jehai          | 59,741        | 65,492        | 73,336         | 60,820        | 66,859        | 73,613         | 68,006        | 73,485         | 82,772         |
| Mamanwa        | 60,831        | 66,721        | 75,584         | 62,288        | 68,502        | 76,183         | 69,158        | 74,765         | 85,052         |

For each comparisons with one African metapopulation, the three columns report the 95% lower confidence limit, the point estimate (in years, assuming a generation interval =25 years), and the 95% upper confidence limit.
